# Supplementary material for: Effect of exogenous treatment with zaxinone and its mimics on rice root microbiota across different growth stages
Source: PubMed Central journal article supplement (PMC11682185; doi:10.1038/s41598-024-82833-6), 2024-12-28
Supplement: 41598_2024_82833_MOESM1_ESM.pdf [file 41598_2024_82833_MOESM1_ESM.pdf]

## Effect of exogenous treatment with zaxinone and its mimics on rice root microbiota across different growth stages.

Teresa Mazzarella<sup>1§</sup>, Matteo Chialva<sup>1§</sup>, Leonardo Perez de Souza<sup>2</sup>, Jian You Wang<sup>3</sup>, Cristina Votta<sup>1</sup>, Rhowell Jr. Tiozon<sup>4</sup>, Patrizia Vaccino<sup>5</sup>, Alessandra Salvioli di Fossalunga<sup>1</sup>, Nese Sreenivasulu<sup>4</sup>, Tadao Asami<sup>6</sup>, Alisdair R. Fernie<sup>2</sup>, Salim Al-Babili<sup>3\*</sup>, Luisa Lanfranco<sup>1</sup>, Valentina Fiorilli<sup>1\*</sup>

<sup>1</sup> Department of Life Sciences and Systems Biology, University of Turin, Turin, Italy. <sup>2</sup>Max-Planck-Institute of Molecular Plant Physiology, Am Mühlenberg 1, 14476 Potsdam-Golm, Germany. <sup>3</sup>The BioActives Lab, Center for Desert Agriculture (CDA), Biological and Environment Science and Engineering (BESE), King Abdullah University of Science and Technology, Thuwal, 23955-6900 Saudi Arabia. <sup>4</sup>Rice Breeding Innovation Department, International Rice Research Institute, Los Baños, Philippines. <sup>5</sup>CREA-CI, Consiglio per la Ricerca in Agricoltura e l'Analisi dell' Economia Agraria, Centro di Ricerca Cerealicoltura e Colture Industriali, Vercelli, Italy. <sup>6</sup>Graduate School of Agricultural and Life Sciences, The University of Tokyo, 1-1-1 Yayoi, Bunkyo-ku, Tokyo 113-8657, Japan.

§These authors contributed equally to the work.

\*Corresponding author. [valentina.fiorilli@unito.it](mailto:valentina.fiorilli@unito.it); [salim.babili@kaust.edu.sa](mailto:salim.babili@kaust.edu.sa)

### Supporting Information

#### Supporting Figures

**Figure S1.** Rarefaction curves of prokaryotic (16S rDNA) amplicon libraries across compartments, treatments and time points.

**Figure S2.** Rarefaction curves of fungal (ITS2 rDNA) amplicon libraries across compartments, treatments and time points.

**Figure S3.** Unconstrained Principal coordinate analysis (PCoA) of Bray-Curtis dissimilarity of ASVs abundances across compartments, treatments and timepoints.

**Figure S4.** Relative abundance of selected bacterial orders in each treatment across timepoints and compartments.

**Figure S5.** Relative abundance of selected fungal orders in each treatment across timepoints and root compartment.

**Figure S6.** Shannon index values ( $\alpha$ -diversity) grouped by compartment, treatment and timepoint in 16S and ITS2 amplicon libraries.

**Figure S7.** Heatmap showing the relative abundances of compartment-enriched bacterial ASVs and their overlap across treatments and timepoints.

**Figure S8.** Assembly and diversity of root-associated microbiota under zaxinone and MiZax treatments at tillering (30 days after transplanting, T1) and milky-stage maturation (90 days after transplanting, T2).

**Figure S9.** Node centrality metrics of the root endosphere bacterial co-occurrence networks for each treatment and timepoint (rows).

**Figure S10.** Analysis of biochemical parameters in rice grains from zaxinone and MiZax-treated plants.

*Supporting Tables*

**Table S1.** Soil physico-chemical characteristics of the native paddy soil used in the mesocosm experiment.

**Table S2.** PERMANOVA table (*adonis*, 9999 permutations) of the Bray-Curtis dissimilarities for bacterial and fungal microbial communities.

**Table S3.** PERMANOVA table (*adonis*, 9999 permutations) of the Bray-Curtis dissimilarities for bacterial and fungal microbial communities grouped by compartment and timepoint.

**Table S4.** Pairwise PERMANOVA table (*adonis*, 9999 permutations) of the Bray-Curtis dissimilarities for the different prokaryotes communities.

**Table S5.** Pairwise PERMANOVA table (*adonis*, 9999 permutations) of the Bray-Curtis dissimilarities for the different fungal communities.

**Table S6.** Network-level metrics for each of the bacterial community co-occurrences networks constructed.

*Supporting Data*

**Dataset S1.** Raw reads count and ASVs calling statistics for 16S and ITS2 rDNA amplicon libraries.

**Dataset S2.** Differentially abundant prokaryotic ASVs across treatments, timepoints and compartments.

**Dataset S3.** Differentially abundant fungal ASVs across treatments, timepoints and compartments.

## Supplementary Figures

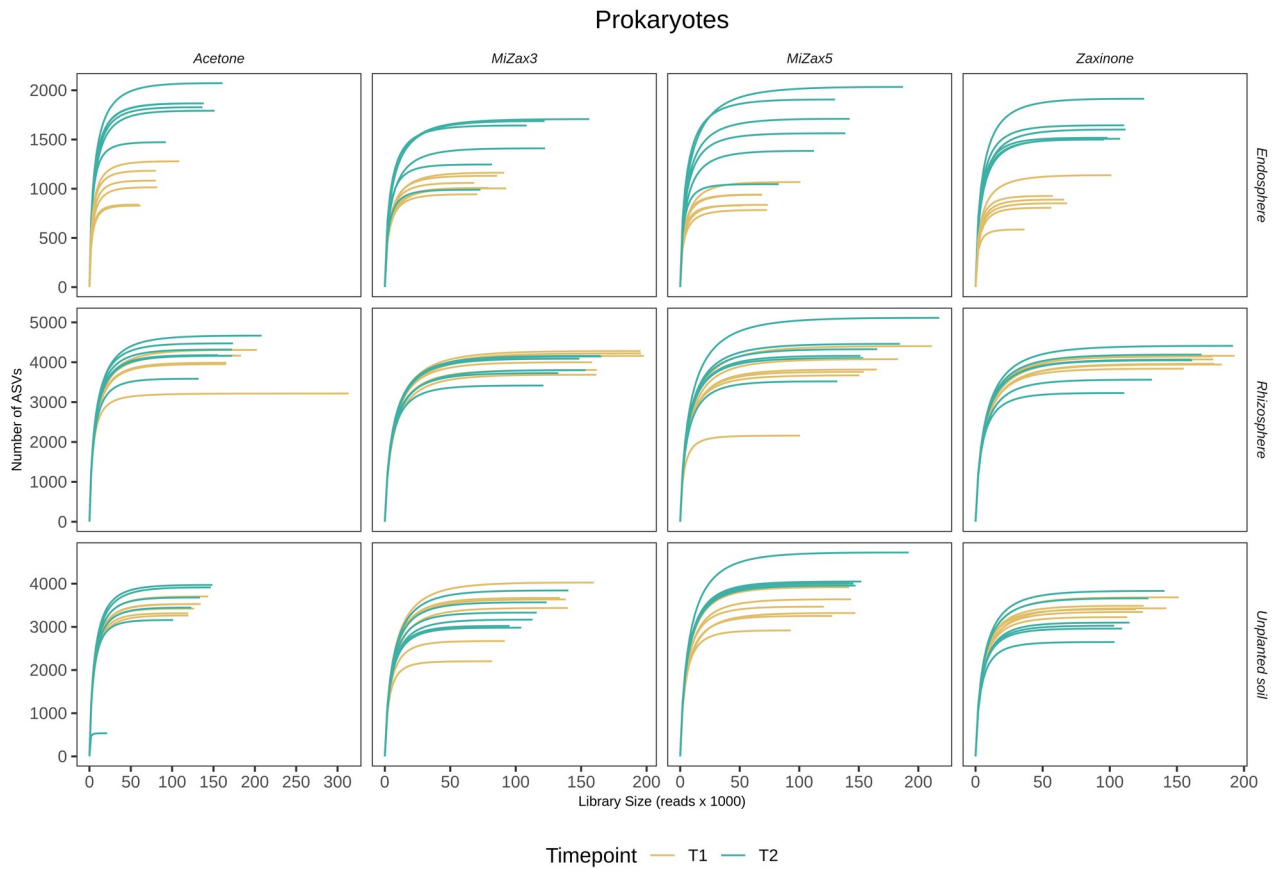

**Figure S1. Rarefaction curves of prokaryotic (16S rDNA) amplicon libraries across compartments, treatments and time points.** Timepoints are indicated with different colours; rows and columns indicate treatments and compartments, respectively.

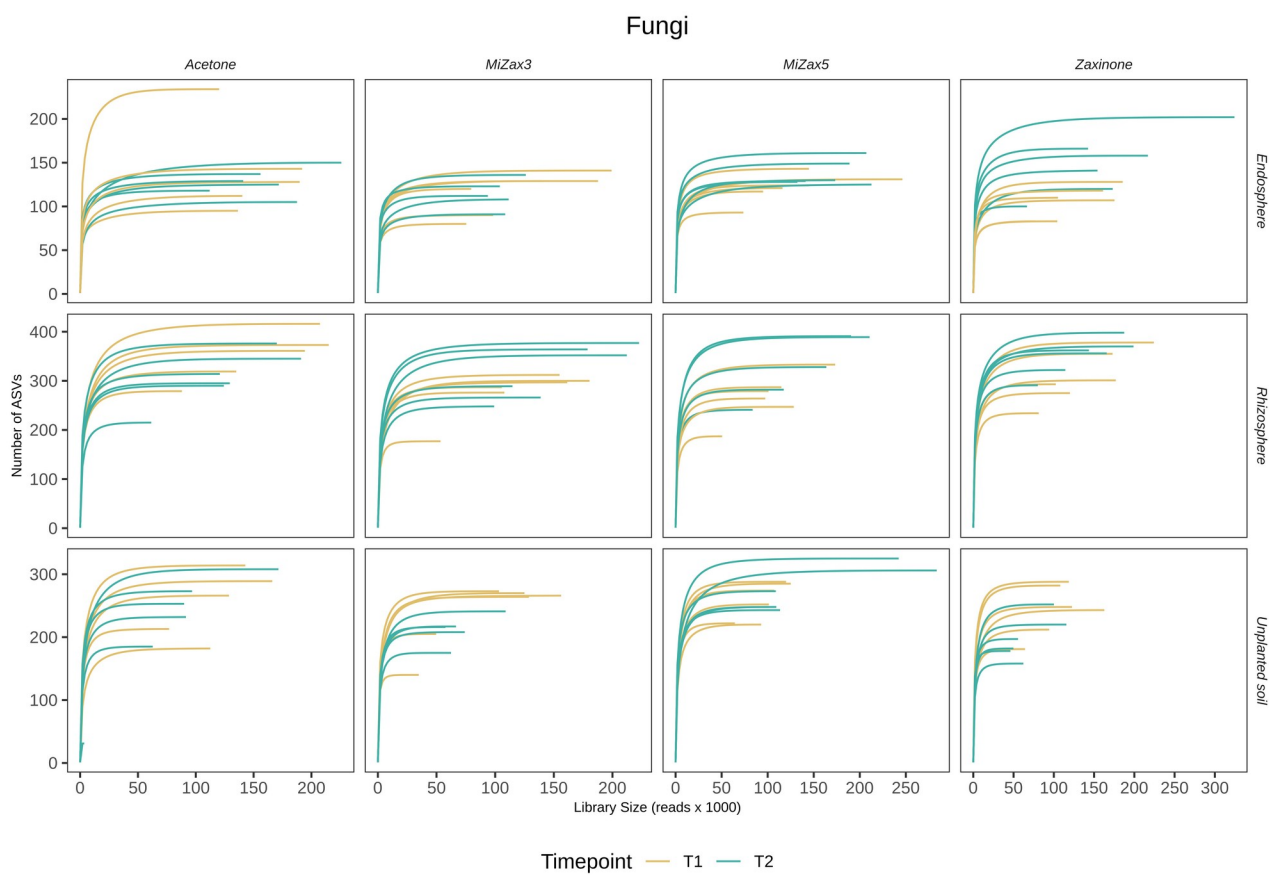

**Figure S2. Rarefaction curves of fungal (ITS2 rDNA) amplicon libraries across compartments, treatments and time points.** Timepoints are indicated with different colours; rows and columns indicate treatments and compartments, respectively.

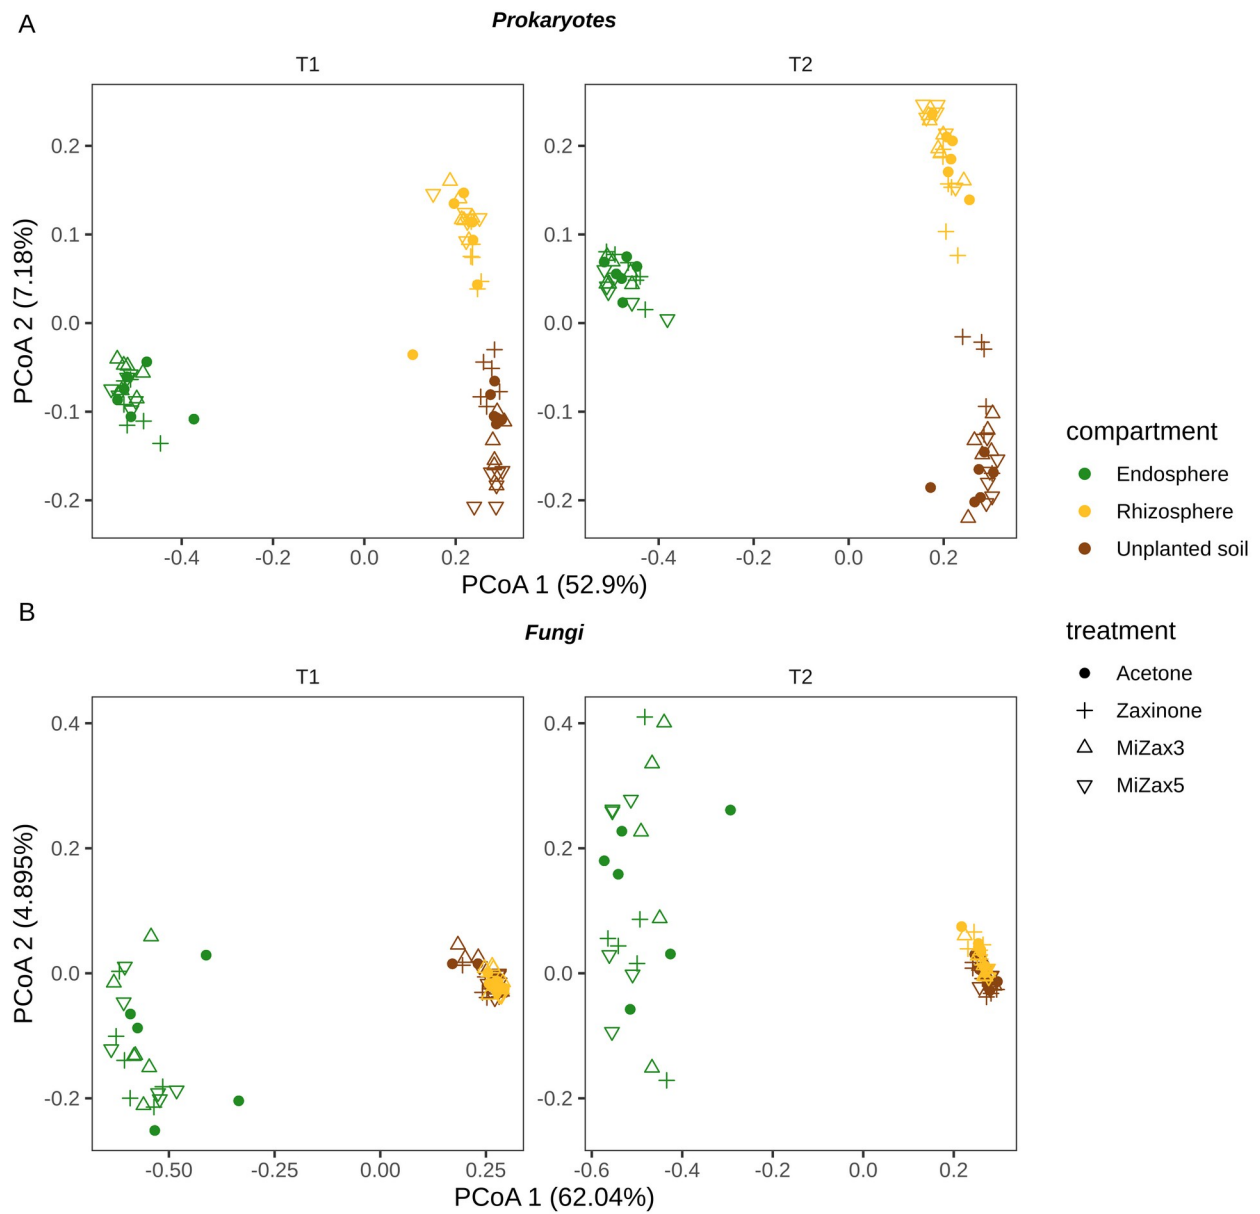

**Figure S3. Unconstrained Principal coordinate analysis (PCoA) of Bray-Curtis dissimilarity of ASVs abundances across compartments, treatments and timepoints.** PCoA for prokaryotic (A) and fungal (B) libraries. Each point represents a single library, treatments are indicated with different shapes while root compartments with different colours. T1, vegetative stage (60 days after transplanting); T2, milky stage maturation stage (120 days after transplanting).

**A**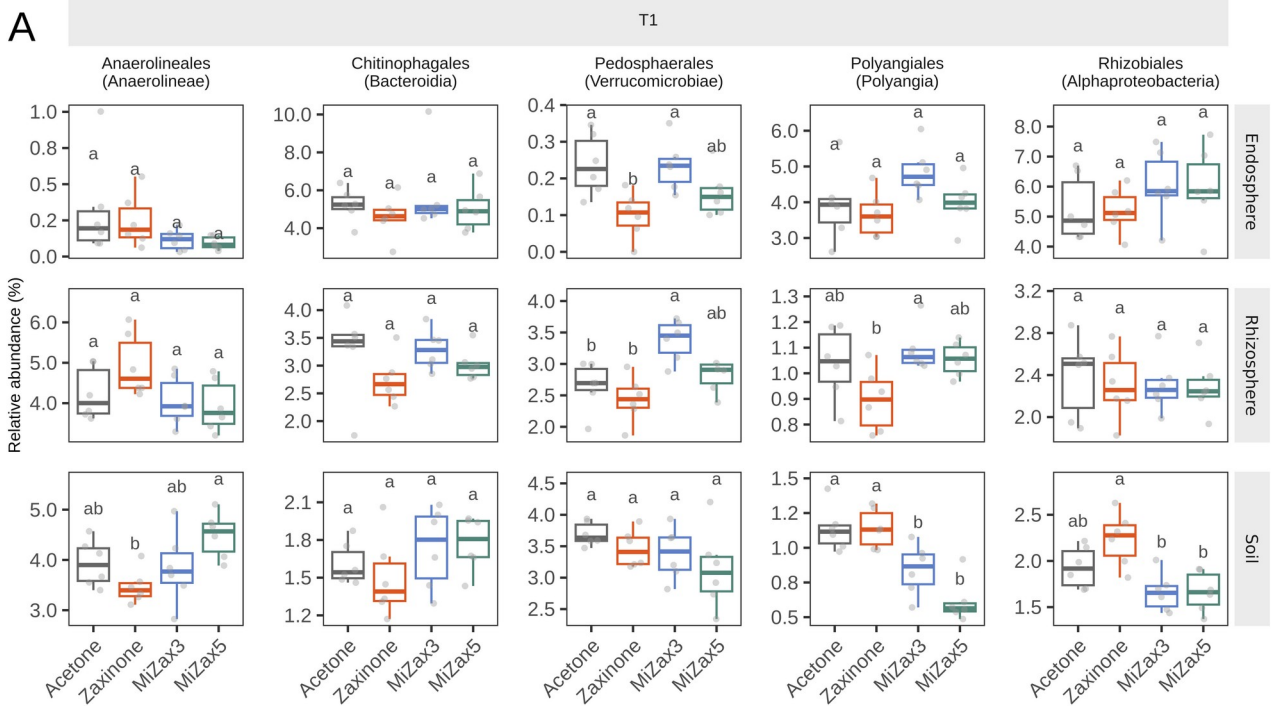**B**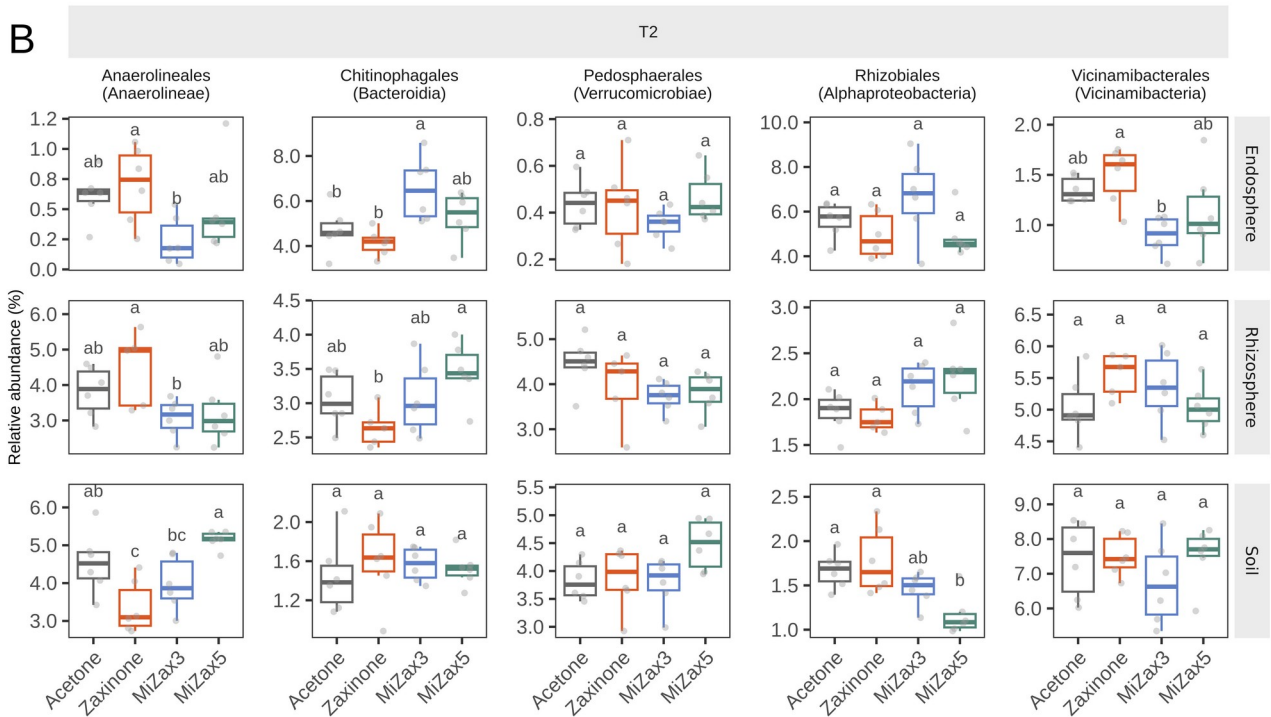

**Figure S4. Relative abundance of selected bacterial orders in each treatment across timepoints and compartments.** Timepoints are indicated in different panels (T1 in **A**, T2 in **B**) while different compartments are shown as rows. Below each order the corresponding class (upper taxonomic rank) is indicated. Boxplots display the median (horizontal line), the quartiles (boxes) and 1.5 interquartile range (whiskers),  $n = 6$ . Letters indicate statistically-supported differences between treatments (Tukey's post hoc test after ANOVA,  $P < 0.05$ ).

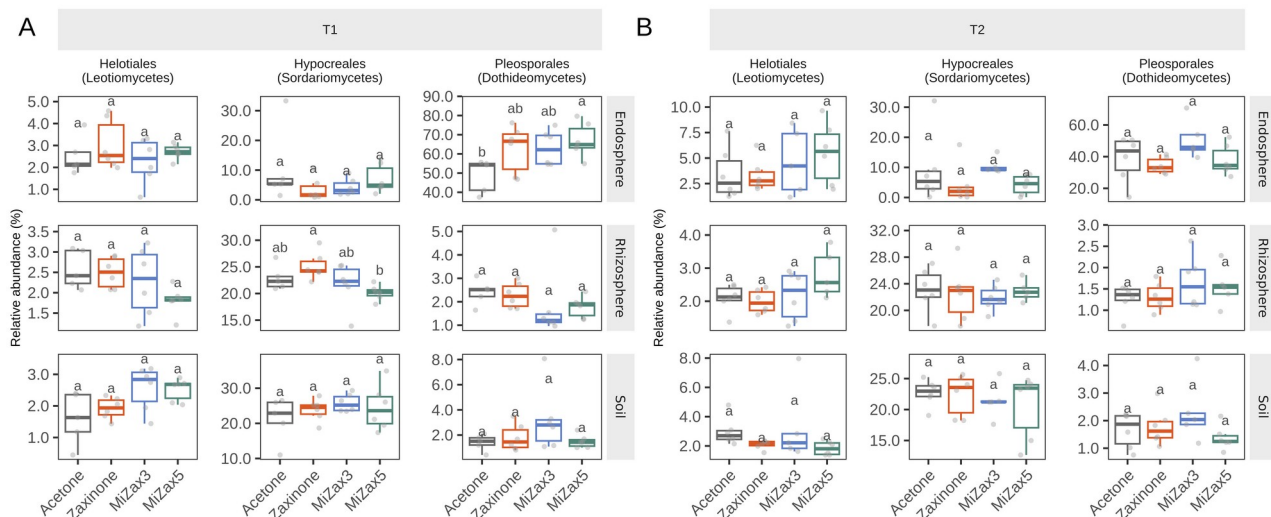

**Figure S5. Relative abundance of selected fungal orders in each treatment across timepoints and root compartment.** Timepoints are indicated in different panels (T1 in **A**, T2 in **B**) while different compartments are shown as rows. Below each order the corresponding class (upper taxonomic rank) is indicated. Boxplots display the median (horizontal line), the quartiles (boxes) and 1.5 interquartile range (whiskers),  $n = 6$ . Letters indicate statistically-supported differences between treatments (Tukey's posthoc test after ANOVA,  $P < 0.05$ ).

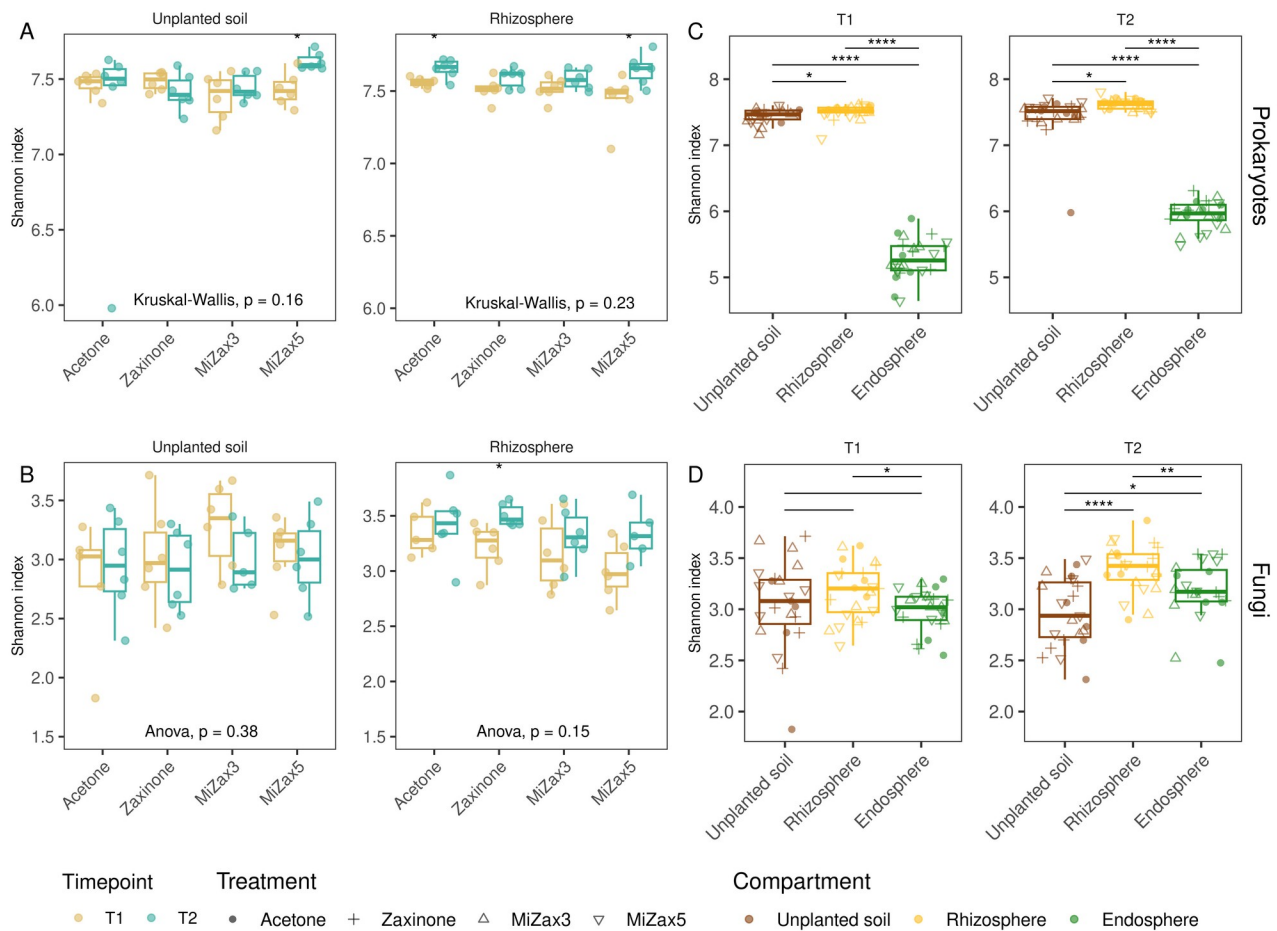



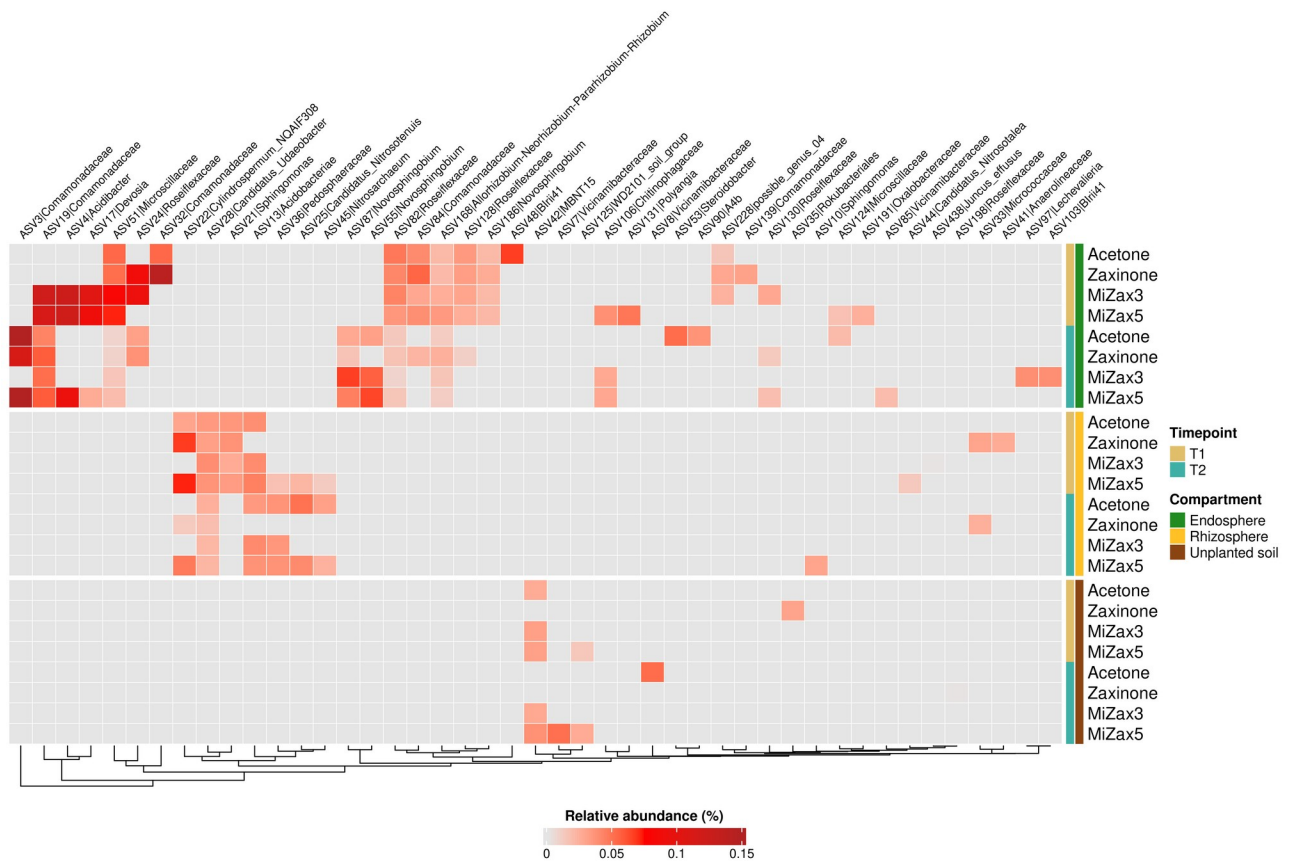

**Figure S7. Heatmap showing the relative abundances of compartment-enriched bacterial ASVs and their overlap across treatments and timepoints.** Only significantly enriched ASVs with a relative abundance higher than 2.5% in at least one condition were plotted. ASV number and the first meaningful taxonomic annotation available is indicated in columns.

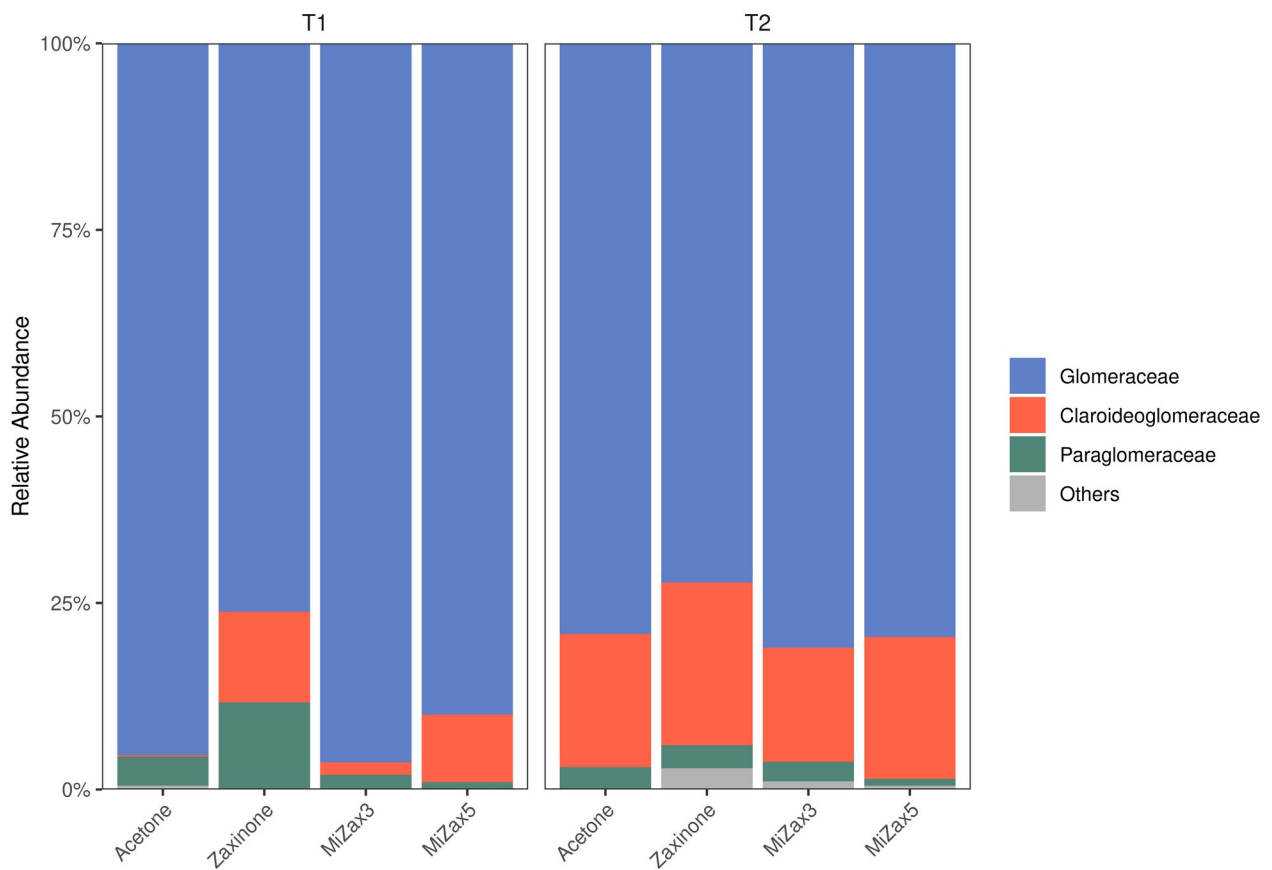

**Figure S8. Assembly and diversity of root-associated microbiota under zaxinone and MiZax treatments at tillering (30 days after transplanting, T1) and milky-stage maturation (90 days after transplanting, T2). Average relative abundances of AMF community at the Class level.**

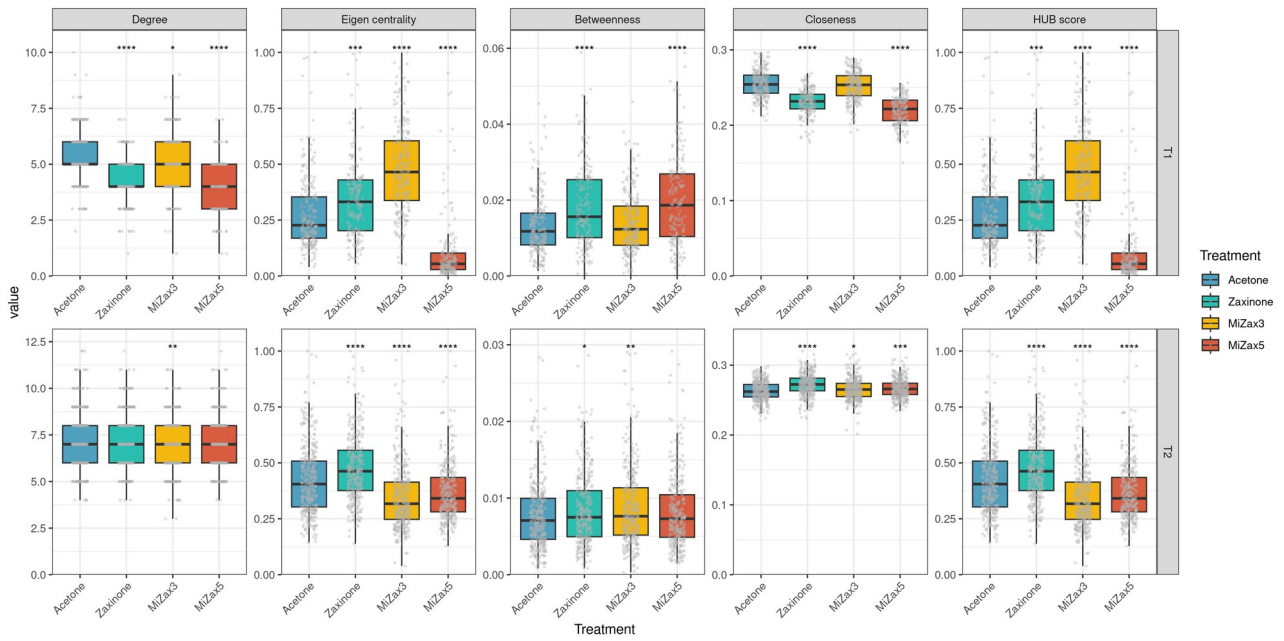

**Figure S9. Node centrality metrics of the root endosphere bacterial co-occurrence networks for each treatment and timepoint (rows).** Asterisks indicates statistically supported differences between each treatments and the acetone control treatment according to the Student's t-test (\*P<0.05, \*\*P<0.01, \*\*\*P<0.001, \*\*\*\*P<0.0001). Boxplots display the median (horizontal line), the quartiles (boxes) and 1.5 interquartile range (whiskers); points represent single nodes within each network.

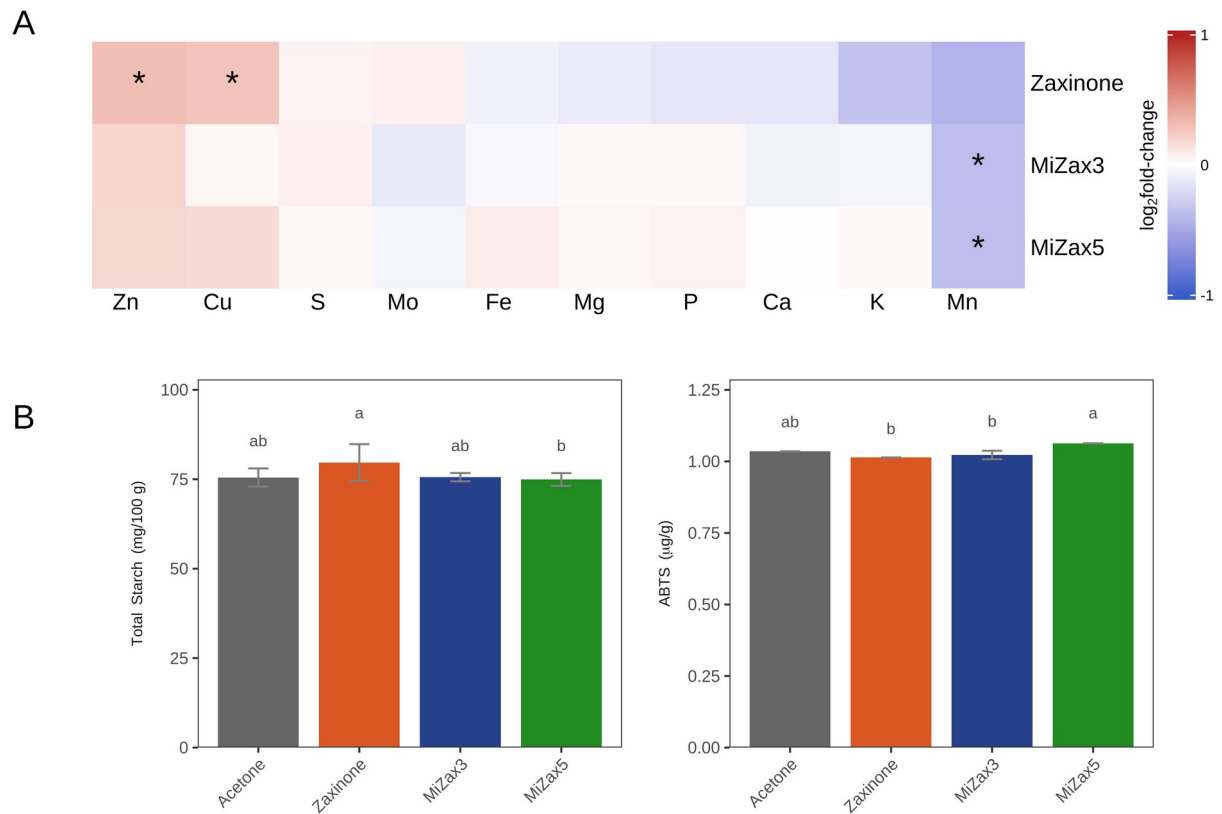

**Figure S10. Analysis of biochemical parameters in rice grains from zaxinone and MiZax-treated plants.** (A) Heatmap plot showing the  $\log_2$ fold-change values of measured elements in each treatment compared to the acetone control NM. Blue and red colours depict a decrease and increase in metabolite levels respectively. Asterisks indicate statistically supported differences between each treatment and the reference acetone condition according to Dunn's post-hoc test after Kruskal-Wallis (\*  $P < 0.05$ , \*\*  $P < 0.01$ , \*\*\*  $P < 0.001$ ). (B) Amount of total starch and antioxidant capacity (ABTS) measured on rice flour from the different treatments. ABTS values were expressed as the Trolox-equivalents per 100 g rice ( $\mu\text{mol TE}/100 \text{ g}$ ). Letters above each bar indicate statistically-supported differences across conditions according to Dunn's post-hoc test after Kruskal-Wallis ( $P < 0.05$ ).

## Supplementary Tables

**Table S1. Soil physico-chemical characteristics of the native paddy soil used in the mesocosm experiment.** Values were measured on 3 soil subsamples, mean  $\pm$  standard deviation for each parameter is indicated.

|                       | measure unit                          | value               |
|-----------------------|---------------------------------------|---------------------|
| Sand                  | $\text{g} \cdot \text{kg}^{-1}$       | $473.22 \pm 20.98$  |
| Silt                  | $\text{g} \cdot \text{kg}^{-1}$       | $426.50 \pm 10.33$  |
| Clay                  | $\text{g} \cdot \text{kg}^{-1}$       | $100.28 \pm 12.33$  |
| Texture               | USDA classification                   | Loam                |
| pH (H <sub>2</sub> O) |                                       | $7.77 \pm 0.06$     |
| Total C (TC)          | $\text{g} \cdot \text{kg}^{-1}$       | $14.15 \pm 0.90$    |
| Total N (TN)          | $\text{g} \cdot \text{kg}^{-1}$       | $1.73 \pm 0.08$     |
| C/N ratio             | ratio                                 | $8.59 \pm 0.23$     |
| CaCO <sub>3</sub>     | $\text{g} \cdot \text{kg}^{-1}$       | $15.97 \pm 0.82$    |
| P Olsen               | $\text{mg} \cdot \text{kg}^{-1}$      | $48.75 \pm 1.11$    |
| CEC*                  | $\text{c mol}^+ \cdot \text{kg}^{-1}$ | $10.54 \pm 0.77$    |
| Exchangeable cations  |                                       |                     |
| Mg                    | $\text{mg} \cdot \text{kg}^{-1}$      | $153.33 \pm 15.86$  |
| K                     | $\text{mg} \cdot \text{kg}^{-1}$      | $95.34 \pm 2.26$    |
| Ca                    | $\text{mg} \cdot \text{kg}^{-1}$      | $1200.72 \pm 68.09$ |

**Notes:** \*Cation Exchange Capability.

**Table S2. PERMANOVA table (*adonis*, 9999 permutations) of the Bray-Curtis dissimilarities for bacterial and fungal microbial communities.** Significant results ( $p < 0.05$ ) are highlighted in bold type.

| 16S rDNA libraries (Prokaryotes)    |     |              |         |          |               |                        |
|-------------------------------------|-----|--------------|---------|----------|---------------|------------------------|
| Source of variation                 | Df  | Sums of Sqs. | R2      | F        | p-value       | Explained variance (%) |
| compartment                         | 2   | 19.724       | 0.58866 | 144.4632 | <b>0.0001</b> | 58.866                 |
| treatment                           | 3   | 0.466        | 0.0139  | 2.2743   | <b>0.0188</b> | 1.390                  |
| timepoint                           | 1   | 1.446        | 0.04314 | 21.1757  | <b>0.0001</b> | 4.314                  |
| compartment × treatment             | 6   | 1.169        | 0.03489 | 2.8544   | <b>0.0003</b> | 3.489                  |
| compartment × timepoint             | 2   | 1.454        | 0.04341 | 10.6524  | <b>0.0001</b> | 4.341                  |
| treatment × timepoint               | 3   | 0.408        | 0.01216 | 1.9899   | <b>0.0397</b> | 1.216                  |
| compartment × treatment × timepoint | 6   | 0.648        | 0.01934 | 1.5819   | 0.0552        | 1.934                  |
| Residual                            | 120 | 8.192        | 0.24449 |          |               | 24.449                 |
| Total                               | 143 | 33.507       | 1       |          |               | 100                    |

  

| ITS2 rDNA libraries (Fungi)         |     |              |         |          |               |                        |
|-------------------------------------|-----|--------------|---------|----------|---------------|------------------------|
| Source of variation                 | Df  | Sums of Sqs. | R2      | F        | p-value       | Explained variance (%) |
| compartment                         | 2   | 19.4752      | 0.6226  | 124.1137 | <b>0.0001</b> | 62.26                  |
| treatment                           | 3   | 0.2457       | 0.00785 | 1.0438   | 0.3623        | 0.785                  |
| timepoint                           | 1   | 0.5676       | 0.01814 | 7.234    | <b>0.0006</b> | 1.814                  |
| compartment × treatment             | 6   | 0.5179       | 0.01656 | 1.1002   | 0.3286        | 1.656                  |
| compartment × timepoint             | 2   | 0.8534       | 0.02728 | 5.4386   | <b>0.0002</b> | 2.728                  |
| treatment × timepoint               | 3   | 0.2378       | 0.0076  | 1.0105   | 0.3937        | 0.76                   |
| compartment × treatment × timepoint | 6   | 0.4385       | 0.01402 | 0.9316   | 0.5114        | 1.402                  |
| Residual                            | 114 | 8.9441       | 0.28593 |          |               | 28.593                 |
| Total                               | 137 | 31.2803      | 1       |          |               | 100                    |

**Table S3. PERMANOVA table (adonis, 9999 permutations) of the Bray-Curtis dissimilarities for bacterial and fungal microbial communities grouped by compartment and timepoint.** Significant results ( $p < 0.05$ ) are highlighted in bold type.

| 16S rDNA libraries (Prokaryotes) |     |              |      |      |                |                        |
|----------------------------------|-----|--------------|------|------|----------------|------------------------|
| <b>Endosphere T1</b>             |     |              |      |      |                |                        |
| treatment                        | Df. | Sums of Sqs. | R2   | F    | <i>p-value</i> | Explained variance (%) |
| treatment                        | 3   | 0.56         | 0.23 | 2.04 | <b>0.001</b>   | 23.44                  |
| Residual                         | 20  | 1.84         | 0.77 |      |                | 76.56                  |
| Total                            | 23  | 2.4          | 1    |      |                | 100                    |
| <b>Endosphere T2</b>             |     |              |      |      |                |                        |
| treatment                        | 3   | 0.74         | 0.29 | 2.77 | <b>0.0001</b>  | 29.36                  |
| Residual                         | 20  | 1.77         | 0.71 |      |                | 70.64                  |
| Total                            | 23  | 2.51         | 1    |      |                | 100                    |
| <b>Rhizosphere T1</b>            |     |              |      |      |                |                        |
| treatment                        | 3   | 0.24         | 0.18 | 1.42 | 0.07           | 17.52                  |
| Residual                         | 20  | 1.11         | 0.82 |      |                | 82.48                  |
| Total                            | 23  | 1.35         | 1    |      |                | 100                    |
| <b>Rhizosphere T2</b>            |     |              |      |      |                |                        |
| treatment                        | 3   | 0.35         | 0.25 | 2.2  | <b>0.02</b>    | 24.84                  |
| Residual                         | 20  | 1.05         | 0.75 |      |                | 75.16                  |
| Total                            | 23  | 1.39         | 1    |      |                | 100                    |
| <b>Unplanted soil T1</b>         |     |              |      |      |                |                        |
| treatment                        | 3   | 0.37         | 0.25 | 2.17 | <b>0.01</b>    | 24.6                   |
| Residual                         | 20  | 1.13         | 0.75 |      |                | 75.4                   |
| Total                            | 23  | 1.49         | 1    |      |                | 100                    |
| <b>Unplanted soil T2</b>         |     |              |      |      |                |                        |
| treatment                        | 3   | 0.44         | 0.25 | 2.27 | <b>0.0003</b>  | 25.42                  |
| Residual                         | 20  | 1.29         | 0.75 |      |                | 74.58                  |
| Total                            | 23  | 1.73         | 1    |      |                | 100                    |

**ITS2 rDNA libraries (Fungi)**

| <b>Endosphere T1</b> | <b>Df</b> | <b>Sums of Sqs.</b> | <b>R2</b> | <b>F</b> | <b>p-value</b> | <b>Explained variance (%)</b> |
|----------------------|-----------|---------------------|-----------|----------|----------------|-------------------------------|
| treatment            | 3         | 0.26                | 0.13      | 0.92     | 0.57           | 12.74                         |
| Residual             | 19        | 1.8                 | 0.87      |          |                | 87.26                         |
| Total                | 22        | 2.07                | 1         |          |                | 100                           |

| <b>Endosphere T2</b> | <b>Df</b> | <b>Sums of Sqs.</b> | <b>R2</b> | <b>F</b> | <b>p-value</b> | <b>Explained variance (%)</b> |
|----------------------|-----------|---------------------|-----------|----------|----------------|-------------------------------|
| treatment            | 3         | 0.58                | 0.13      | 0.97     | 0.51           | 13.31                         |
| Residual             | 19        | 3.77                | 0.87      |          |                | 86.69                         |
| Total                | 22        | 4.35                | 1         |          |                | 100                           |

| <b>Rhizosphere T1</b> | <b>Df</b> | <b>Sums of Sqs.</b> | <b>R2</b> | <b>F</b> | <b>p-value</b> | <b>Explained variance (%)</b> |
|-----------------------|-----------|---------------------|-----------|----------|----------------|-------------------------------|
| treatment             | 3         | 0.14                | 0.18      | 1.37     | 0.1            | 17.75                         |
| Residual              | 19        | 0.63                | 0.82      |          |                | 82.25                         |
| Total                 | 22        | 0.77                | 1         |          |                | 100                           |

| <b>Rhizosphere T2</b> | <b>Df</b> | <b>Sums of Sqs.</b> | <b>R2</b> | <b>F</b> | <b>p-value</b> | <b>Explained variance (%)</b> |
|-----------------------|-----------|---------------------|-----------|----------|----------------|-------------------------------|
| treatment             | 3         | 0.16                | 0.18      | 1.37     | 0.11           | 17.82                         |
| Residual              | 19        | 0.72                | 0.82      |          |                | 82.18                         |
| Total                 | 22        | 0.88                | 1         |          |                | 100                           |

| <b>Unplanted soil T1</b> | <b>Df</b> | <b>Sums of Sqs.</b> | <b>R2</b> | <b>F</b> | <b>p-value</b> | <b>Explained variance (%)</b> |
|--------------------------|-----------|---------------------|-----------|----------|----------------|-------------------------------|
| treatment                | 3         | 0.18                | 0.13      | 0.92     | 0.54           | 12.7                          |
| Residual                 | 19        | 1.21                | 0.87      |          |                | 87.3                          |
| Total                    | 22        | 1.39                | 1         |          |                | 100                           |

| <b>Unplanted soil T2</b> | <b>Df</b> | <b>Sums of Sqs.</b> | <b>R2</b> | <b>F</b> | <b>p-value</b> | <b>Explained variance (%)</b> |
|--------------------------|-----------|---------------------|-----------|----------|----------------|-------------------------------|
| treatment                | 3         | 0.12                | 0.13      | 0.91     | 0.53           | 12.61                         |
| Residual                 | 19        | 0.8                 | 0.87      |          |                | 87.39                         |
| Total                    | 22        | 0.92                | 1         |          |                | 100                           |



**Table S4. Pairwise PERMANOVA table (*adonis*. 9999 permutations) of the Bray-Curtis dissimilarities for the different prokaryotes communities. Significant results ( $p < 0.05$ ) are highlighted in bold type.**

| T1 - Unplanted soil |    |              |          |           |         |                  |
|---------------------|----|--------------|----------|-----------|---------|------------------|
| Pairs               | Df | Sums of Sqs. | F. Model | R2        | p-value | adjusted p-value |
| Acetone vs MiZax3   | 1  | 0.0623337    | 1.084679 | 0.0978539 | 0.295   | 0.295            |
| Acetone vs MiZax5   | 1  | 0.1304107    | 2.511379 | 0.2007276 | 0.003   | <b>0.018</b>     |
| Acetone vs Zaxinone | 1  | 0.0835784    | 1.636398 | 0.1406275 | 0.102   | 0.153            |
| MiZax3 vs MiZax5    | 1  | 0.0742791    | 1.206230 | 0.1076393 | 0.278   | 0.295            |
| MiZax3 vs Zaxinone  | 1  | 0.1412228    | 2.325564 | 0.1886781 | 0.034   | 0.068            |
| MiZax5 vs Zaxinone  | 1  | 0.2430916    | 4.404895 | 0.3057916 | 0.011   | <b>0.033</b>     |

  

| T2 - Unplanted soil |    |              |           |           |         |                  |
|---------------------|----|--------------|-----------|-----------|---------|------------------|
| Pairs               | Df | Sums of Sqs. | F. Model  | R2        | p-value | adjusted p-value |
| Acetone vs MiZax3   | 1  | 0.0684950    | 0.8625125 | 0.0794027 | 0.585   | 0.585            |
| Acetone vs MiZax5   | 1  | 0.1588905    | 2.5653276 | 0.2041592 | 0.013   | <b>0.026</b>     |
| Acetone vs Zaxinone | 1  | 0.1663870    | 2.0603317 | 0.1708354 | 0.030   | <b>0.045</b>     |
| MiZax3 vs MiZax5    | 1  | 0.1393194    | 2.8803488 | 0.2236235 | 0.012   | <b>0.026</b>     |
| MiZax3 vs Zaxinone  | 1  | 0.0963320    | 1.4337556 | 0.1253967 | 0.145   | 0.174            |
| MiZax5 vs Zaxinone  | 1  | 0.2506567    | 5.0420748 | 0.3351981 | 0.001   | <b>0.006</b>     |

  

| T1 - Rhizosphere    |    |              |          |           |         |                  |
|---------------------|----|--------------|----------|-----------|---------|------------------|
| Pairs               | Df | Sums of Sqs. | F. Model | R2        | p-value | adjusted p-value |
| Acetone vs MiZax3   | 1  | 0.0911381    | 1.356700 | 0.1194625 | 0.152   | 0.228            |
| Acetone vs MiZax5   | 1  | 0.0755591    | 1.182208 | 0.1057222 | 0.205   | 0.246            |
| Acetone vs Zaxinone | 1  | 0.0862085    | 1.399001 | 0.1227302 | 0.050   | 0.228            |
| MiZax3 vs MiZax5    | 1  | 0.0564236    | 1.133172 | 0.1017834 | 0.261   | 0.261            |
| MiZax3 vs Zaxinone  | 1  | 0.0817088    | 1.720164 | 0.1467696 | 0.152   | 0.228            |
| MiZax5 vs Zaxinone  | 1  | 0.0822477    | 1.859218 | 0.1567741 | 0.079   | 0.228            |

  

| T2 - Rhizosphere    |    |              |           |           |         |                  |
|---------------------|----|--------------|-----------|-----------|---------|------------------|
| Pairs               | Df | Sums of Sqs. | F. Model  | R2        | p-value | adjusted p-value |
| Acetone vs MiZax3   | 1  | 0.0682804    | 1.2538995 | 0.1114191 | 0.190   | 0.228            |
| Acetone vs MiZax5   | 1  | 0.0942010    | 1.8249212 | 0.1543284 | 0.092   | 0.138            |
| Acetone vs Zaxinone | 1  | 0.0986186    | 2.1024349 | 0.1737200 | 0.042   | 0.084            |
| MiZax3 vs MiZax5    | 1  | 0.0436855    | 0.7553189 | 0.0702275 | 0.610   | 0.610            |
| MiZax3 vs Zaxinone  | 1  | 0.1690871    | 3.1828297 | 0.2414375 | 0.016   | <b>0.048</b>     |
| MiZax5 vs Zaxinone  | 1  | 0.2186206    | 4.3472374 | 0.3030017 | 0.013   | <b>0.048</b>     |

| <b>T1 - Endosphere</b> |           |                     |                 |           |                |                         |
|------------------------|-----------|---------------------|-----------------|-----------|----------------|-------------------------|
| <b>Pairs</b>           | <b>Df</b> | <b>Sums of Sqs.</b> | <b>F. Model</b> | <b>R2</b> | <b>p-value</b> | <b>adjusted p-value</b> |
| Acetone vs MiZax3      | 1         | 0.1062069           | 1.154188        | 0.1034758 | 0.303          | 0.3030                  |
| Acetone vs MiZax5      | 1         | 0.1840651           | 1.947217        | 0.1629850 | 0.024          | <b>0.0480</b>           |
| Acetone vs Zaxinone    | 1         | 0.2358737           | 2.293669        | 0.1865732 | 0.025          | <b>0.0480</b>           |
| MiZax3 vs MiZax5       | 1         | 0.1378798           | 1.697408        | 0.1451097 | 0.058          | 0.0696                  |
| MiZax3 vs Zaxinone     | 1         | 0.2662671           | 2.973749        | 0.2292128 | 0.005          | <b>0.0300</b>           |
| MiZax5 vs Zaxinone     | 1         | 0.1970708           | 2.140963        | 0.1763421 | 0.032          | <b>0.0480</b>           |

| <b>T2 - Endosphere</b> |           |                     |                 |           |                |                         |
|------------------------|-----------|---------------------|-----------------|-----------|----------------|-------------------------|
| <b>Pairs</b>           | <b>Df</b> | <b>Sums of Sqs.</b> | <b>F. Model</b> | <b>R2</b> | <b>p-value</b> | <b>adjusted p-value</b> |
| Acetone vs MiZax3      | 1         | 0.2992602           | 3.373539        | 0.2522548 | 0.003          | <b>0.006</b>            |
| Acetone vs MiZax5      | 1         | 0.1491118           | 1.671478        | 0.1432105 | 0.021          | <b>0.021</b>            |
| Acetone vs Zaxinone    | 1         | 0.1612909           | 2.223456        | 0.1819008 | 0.002          | <b>0.006</b>            |
| MiZax3 vs MiZax5       | 1         | 0.2993760           | 2.860485        | 0.2224244 | 0.005          | <b>0.006</b>            |
| MiZax3 vs Zaxinone     | 1         | 0.3181702           | 3.615973        | 0.2655685 | 0.002          | <b>0.006</b>            |
| MiZax5 vs Zaxinone     | 1         | 0.2455352           | 2.774669        | 0.2172008 | 0.004          | <b>0.006</b>            |

**Table S5. Pairwise PERMANOVA table (*adonis*. 9999 permutations) of the Bray-Curtis dissimilarities for the different fungal communities. Significant results ( $p < 0.05$ ) are highlighted in bold type.**

| <b>T1 - Unplanted soil</b> |           |                     |                 |            |                |                         |
|----------------------------|-----------|---------------------|-----------------|------------|----------------|-------------------------|
| <b>Pairs</b>               | <b>Df</b> | <b>Sums of Sqs.</b> | <b>F. Model</b> | <b>R2</b>  | <b>p-value</b> | <b>adjusted p-value</b> |
| Acetone vs MiZax3          | 1         | 0.0906293           | 1.1429582       | 0.11268489 | 0.256          | 0.732                   |
| Acetone vs MiZax5          | 1         | 0.053969            | 0.8198247       | 0.0834867  | 0.732          | 0.732                   |
| Acetone vs Zaxinone        | 1         | 0.05737572          | 0.7703198       | 0.07884285 | 0.725          | 0.732                   |
| MiZax3 vs MiZax5           | 1         | 0.03868185          | 0.7129326       | 0.06654878 | 0.706          | 0.732                   |
| MiZax3 vs Zaxinone         | 1         | 0.07454264          | 1.2014261       | 0.10725653 | 0.228          | 0.732                   |
| MiZax5 vs Zaxinone         | 1         | 0.03981954          | 0.7975424       | 0.07386333 | 0.58           | 0.732                   |
| <b>T2 - Unplanted soil</b> |           |                     |                 |            |                |                         |
| <b>Pairs</b>               | <b>Df</b> | <b>Sums of Sqs.</b> | <b>F. Model</b> | <b>R2</b>  | <b>p-value</b> | <b>adjusted p-value</b> |
| Acetone vs MiZax3          | 1         | 0.01686328          | 0.4497545       | 0.0475943  | 0.967          | 0.967                   |
| Acetone vs MiZax5          | 1         | 0.05693306          | 1.3093455       | 0.11577553 | 0.213          | 0.6975                  |
| Acetone vs Zaxinone        | 1         | 0.03812559          | 0.837483        | 0.07727652 | 0.465          | 0.6975                  |
| MiZax3 vs MiZax5           | 1         | 0.03739026          | 0.9696255       | 0.09725797 | 0.388          | 0.6975                  |
| MiZax3 vs Zaxinone         | 1         | 0.02686668          | 0.6580071       | 0.06813074 | 0.681          | 0.8172                  |
| MiZax5 vs Zaxinone         | 1         | 0.05247284          | 1.1288256       | 0.10143259 | 0.294          | 0.6975                  |
| <b>T1 - Rhizosphere</b>    |           |                     |                 |            |                |                         |
| <b>Pairs</b>               | <b>Df</b> | <b>Sums of Sqs.</b> | <b>F. Model</b> | <b>R2</b>  | <b>p-value</b> | <b>adjusted p-value</b> |
| Acetone vs MiZax3          | 1         | 0.04229463          | 1.145.755       | 0.11292952 | 0.284          | 0.3408                  |
| Acetone vs MiZax5          | 1         | 0.05494233          | 2.225.339       | 0.19824248 | 0.05           | 0.195                   |
| Acetone vs Zaxinone        | 1         | 0.04849414          | 172.137         | 0.160555   | 0.065          | 0.195                   |
| MiZax3 vs MiZax5           | 1         | 0.04940456          | 1.311.273       | 0.11592623 | 0.224          | 0.336                   |
| MiZax3 vs Zaxinone         | 1         | 0.03911445          | 0.95843         | 0.08746052 | 0.401          | 0.401                   |
| MiZax5 vs Zaxinone         | 1         | 0.03860308          | 1.295.029       | 0.11465475 | 0.207          | 0.336                   |
| <b>T2 - Rhizosphere</b>    |           |                     |                 |            |                |                         |
| <b>Pairs</b>               | <b>Df</b> | <b>Sums of Sqs.</b> | <b>F. Model</b> | <b>R2</b>  | <b>p-value</b> | <b>adjusted p-value</b> |
| Acetone vs MiZax3          | 1         | 0.0385935           | 0.8635826       | 0.07949335 | 0.488          | 0.5856                  |
| Acetone vs MiZax5          | 1         | 0.04202185          | 11.772.037      | 0.11567065 | 0.267          | 0.4005                  |
| Acetone vs Zaxinone        | 1         | 0.05821635          | 14.237.313      | 0.12462927 | 0.105          | 0.244                   |
| MiZax3 vs MiZax5           | 1         | 0.02925792          | 0.8371146       | 0.08509757 | 0.62           | 0.62                    |
| MiZax3 vs Zaxinone         | 1         | 0.06549974          | 16.285.725      | 0.14004922 | 0.122          | 0.244                   |
| MiZax5 vs Zaxinone         | 1         | 0.07972768          | 25.945.684      | 0.22377447 | 0.014          | 0.084                   |

| <b>T1 - Endosphere</b> |           |                     |                 |            |                |                         |
|------------------------|-----------|---------------------|-----------------|------------|----------------|-------------------------|
| <b>Pairs</b>           | <b>Df</b> | <b>Sums of Sqs.</b> | <b>F. Model</b> | <b>R2</b>  | <b>p-value</b> | <b>adjusted p-value</b> |
| Acetone vs MiZax3      | 1         | 0.09168269          | 0.8074981       | 0.08233477 | 0.643          | 0.7716                  |
| Acetone vs MiZax5      | 1         | 0.13038263          | 12.819.713      | 0.12468147 | 0.215          | 0.735                   |
| Acetone vs Zaxinone    | 1         | 0.11048722          | 0.9837321       | 0.0985335  | 0.445          | 0.735                   |
| MiZax3 vs MiZax5       | 1         | 0.07543864          | 0.9513652       | 0.08687184 | 0.451          | 0.735                   |
| MiZax3 vs Zaxinone     | 1         | 0.04887284          | 0.550099        | 0.05214159 | 0.847          | 0.847                   |
| MiZax5 vs Zaxinone     | 1         | 0.07549176          | 0.9654572       | 0.08804532 | 0.49           | 0.735                   |

| <b>T2 - Endosphere</b> |           |                     |                 |            |                |                         |
|------------------------|-----------|---------------------|-----------------|------------|----------------|-------------------------|
| <b>Pairs</b>           | <b>Df</b> | <b>Sums of Sqs.</b> | <b>F. Model</b> | <b>R2</b>  | <b>p-value</b> | <b>adjusted p-value</b> |
| Acetone vs MiZax3      | 1         | 0.1499497           | 0.7060818       | 0.07274633 | 0.853          | 0.869                   |
| Acetone vs MiZax5      | 1         | 0.1302824           | 0.6997238       | 0.06539643 | 0.869          | 0.869                   |
| Acetone vs Zaxinone    | 1         | 0.1666122           | 0.7696294       | 0.07146294 | 0.78           | 0.869                   |
| MiZax3 vs MiZax5       | 1         | 0.2101296           | 11.771.836      | 0.11566889 | 0.262          | 0.786                   |
| MiZax3 vs Zaxinone     | 1         | 0.3253509           | 15.335.151      | 0.14558437 | 0.111          | 0.666                   |
| MiZax5 vs Zaxinone     | 1         | 0.1841853           | 0.9902245       | 0.09010048 | 0.441          | 0.869                   |

**Table S6.** Network-level metrics for each of the bacterial community co-occurrences networks constructed. Asterisks indicate differences between real co-occurrence networks and their associated random networks (999 permutations, Z-test,  $P < 0.05$ ).

| Networks    | Nodes | Edges | Positive edges (%) | Transitivity | degree | path length | Betweenness centrality (normalized) | Closeness centrality (normalized) | Eigen-centrality (normalized) | connectivity | Modularity | HUBs No. | Modules No. |
|-------------|-------|-------|--------------------|--------------|--------|-------------|-------------------------------------|-----------------------------------|-------------------------------|--------------|------------|----------|-------------|
| ACE_T1_endo | 222   | 596   | 67.45              | 0.13*        | 5.37   | 3.94*       | 0.013*                              | 0.255*                            | 0.28*                         | 2            | 0.51*      | 6        | 8*          |
| ZAX_T1_endo | 188   | 401   | 60.10              | 0.13*        | 4.27   | 4.36*       | 0.018*                              | 0.231*                            | 0.35*                         | 1            | 0.58*      | 1        | 9*          |
| MX3_T1_endo | 215   | 550   | 56.55              | 0.12*        | 5.12   | 3.99*       | 0.014*                              | 0.252*                            | 0.48*                         | 1            | 0.53*      | 2        | 8*          |
| MX5_T1_endo | 186   | 364   | 60.44              | 0.10*        | 3.91   | 4.59*       | 0.020*                              | 0.219*                            | 0.11*                         | 1            | 0.61*      | 1        | 10*         |
| ACE_T2_endo | 363   | 1305  | 62.53              | 0.17*        | 7.19   | 3.81*       | 0.008*                              | 0.263*                            | 0.42*                         | 4            | 0.51*      | 10       | 6*          |
| ZAX_T2_endo | 317   | 1147  | 56.58              | 0.17*        | 7.24   | 3.69*       | 0.009*                              | 0.272*                            | 0.48*                         | 4            | 0.48*      | 7        | 7*          |
| MX3_T2_endo | 316   | 1084  | 64.85              | 0.18*        | 6.86   | 3.78*       | 0.009*                              | 0.265*                            | 0.35*                         | 3            | 0.51*      | 8        | 6*          |
| MX5_T2_endo | 338   | 1190  | 60.67              | 0.16*        | 7.04   | 3.76*       | 0.008*                              | 0.267*                            | 0.37                          | 4            | 0.51*      | 10       | 7*          |

**Supplementary Datasets** (Provided as separate Excel or tab-delimited files)

**Dataset S1.** Raw reads count and ASVs calling statistics for 16S and ITS2 rDNA amplicon libraries.

**Dataset S2.** Differentially abundant prokaryotic ASVs across treatments, timepoints and compartments.

**Dataset S3.** Differentially abundant fungal ASVs across treatments, timepoints and compartments.
